# Supplementary material
Source: MDPI journal article supplement (https://www.mdpi.com/2076-3417/11/21/10042)
Supplement: s1 [file s1]

Supporting Information for:

## Electrochemical Removal of Cesium Ions via Capacitive Deionization Using an Ion-Exchange Layer Coated on a Carbon Electrode

Sang-Hun Lee <sup>1,2</sup>, Mansoo Choi <sup>2</sup>, Jei-Kwon Moon <sup>2</sup>, Songbok Lee <sup>2</sup>, Jihoon Choi <sup>1</sup> and Seonbyeong Kim <sup>2,\*</sup>

<sup>1</sup> Department of Materials Science and Engineering, Chungnam National University, Daejeon 32134, Korea; leesh24@kaeri.re.kr (S.-H.L.); jihoonc@cnu.ac.kr (J.C.)

<sup>2</sup> Decommissioning Technology Research Division, Korea Atomic Energy Research Institute, Daejeon 34057, Korea; teracms@kaeri.re.kr (M.C.); njkmoon@kaeri.re.kr (J.-K.M.); songboklee@kaeri.re.kr (S.L.)

\* Correspondence: sbkim@kaeri.re.kr; Tel.: +82-42-868-4681

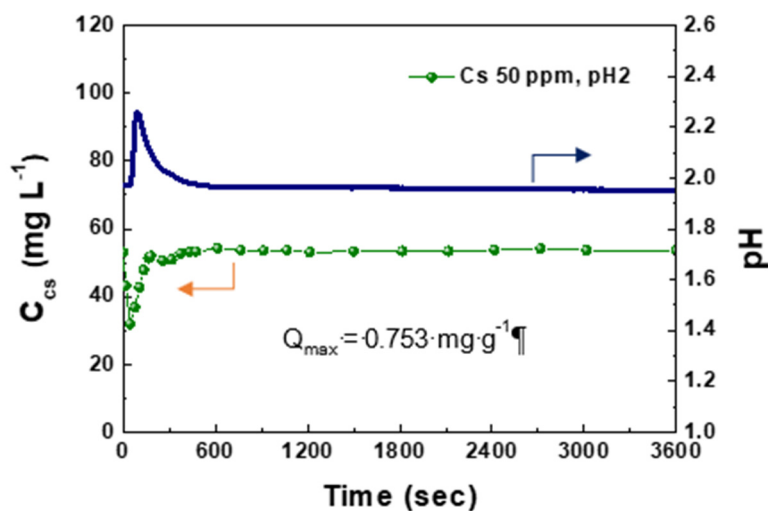

**Figure S1.** Changes in concentration and pH of  $Cs^+$  ions of effluent during the adsorption process (Experimental conditions: Influent of 50  $mg\ L^{-1}$   $Cs^+$  ions at pH 2 was fed with a flow rate of 20  $mL\ min^{-1}$  at 1.2 V for 60 min).
